# Supplementary material for: Construction of engineered 3D islet micro-tissue using porcine decellularized ECM for the treatment of diabetes
Source: Royal Society of Chemistry journal article supplement (doi:10.1039/d3bm00346a), 2023-01-01
Supplement: d3bm00346a1.pdf [file d3bm00346a1.pdf]

## Supporting information

### **Construction of engineered 3D islet micro-tissue using porcine decellularized ECM for the treatment of diabetes**

**Xiaocheng Wang<sup>1,2</sup>, Lijuan Jin<sup>2,3</sup>, Wenyu Liu<sup>2,3</sup>, Lukas Stingelin<sup>2</sup>, Pan Zhang<sup>1\*</sup>,  
Zhikai Tan<sup>2,3\*</sup>**

\* Corresponding author: Dr. Zhikai Tan and Dr. Pan Zhang

Email: [tanzk@hnu.edu.cn](mailto:tanzk@hnu.edu.cn);

1. Department of Infectious Diseases, Third Xiangya Hospital,  
Central South University, Changsha, 410008, China
2. College of Biology, Hunan University,  
Changsha, 410082, China
3. Shenzhen Institute, Hunan University,  
Shenzhen, 518000, China

**Table S1. Sequences of primers used for RT-PCR**

| Gene          | Forward primer       | Reverse primer        |
|---------------|----------------------|-----------------------|
| CD3           | GGCTTGCTGATGGTCATTT  | GGTCATAGTCTGGGTTGG    |
| IL-1 $\alpha$ | CCCGTGTTGCTGAAGGAGT  | GACTTTGTTCTTTGGTGGC   |
| IL-1 $\beta$  | ATGAGCTGGTGAGTGACTTG | CACAGTTGGTCTTCTGGGT   |
| IL-6          | TTGCCTTCTTGGGACTGAT  | TTGCCATTGCACAACCTCTT  |
| IL-8          | TGCTGGCTGTCCTAACCT   | TTGGGACTGCTATCACTTCCT |
| TNF- $\alpha$ | TCTCATTCCCTGCTTGTGGC | CACTTGGTGGTTTGCTACG   |

**Table S2. Porosity of decellularized acellular hydrogels.**

| Specimen              | Adipose Gel | Pancreas Gel | Liver Gel |
|-----------------------|-------------|--------------|-----------|
| M <sub>dry</sub> (g)  | 0.0185      | 0.0256       | 0.0312    |
| M <sub>wet</sub> (g)  | 0.1036      | 0.1252       | 0.1912    |
| V <sub>eth</sub> (mL) | 0.1078      | 0.1262       | 0.2028    |
| Porosity (%)          | 87.49       | 85.54        | 88.64     |

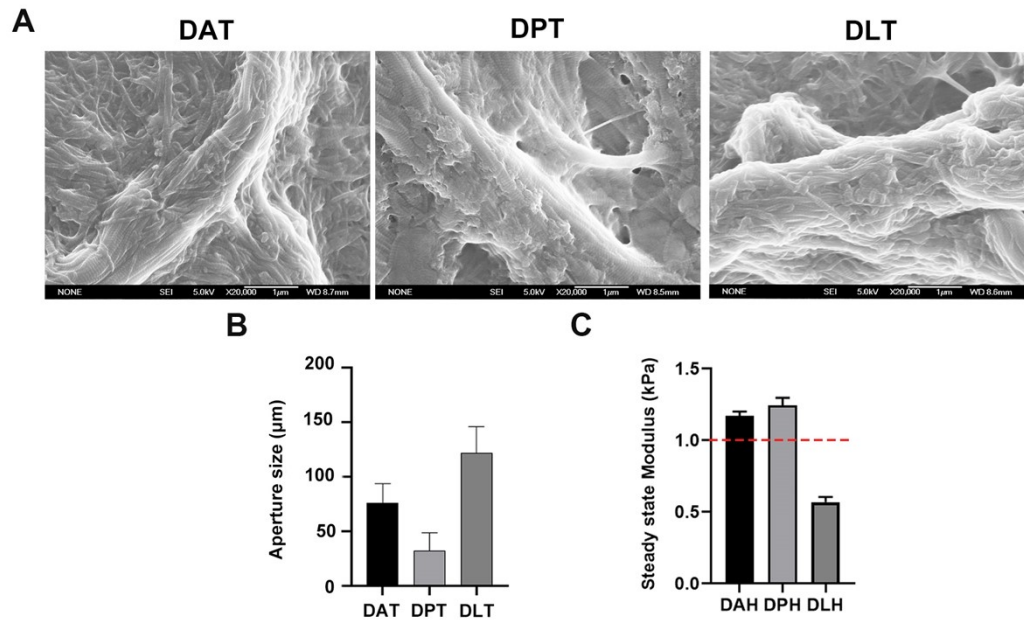**Fig. S1. Microstructure and biochemical properties of decellularized scaffolds. A)**

Scanning electron microscopy of decellularized scaffolds of adipose (DAT), pancreas

(DPT), and liver (DLT) tissues. B) Aperture sizes of scaffolds. C) Steady-state modulus of hydrogel. Dashed red line = reported steady state modulus of normal human pancreatic tissue.

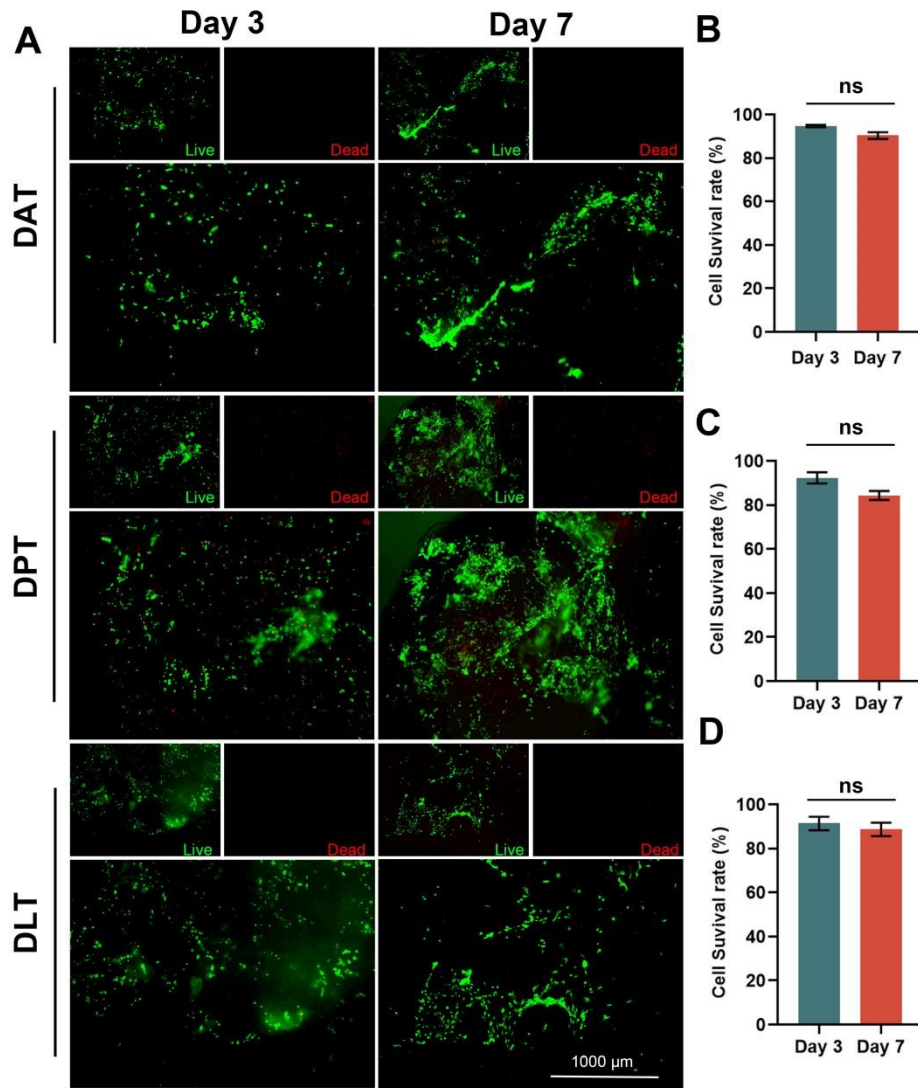

**Fig. S2. Toxicity of decellularized scaffolds.** A) Live/Dead staining after 3 and 7 days of cell inoculation on varied decellularized scaffolds (adipose (DAT), pancreas (DPT), and liver (DLT)). Cell activity was quantified on Day 3 and Day 7 after inoculation on B) DAT, C) DPT, and D) DLT scaffolds.

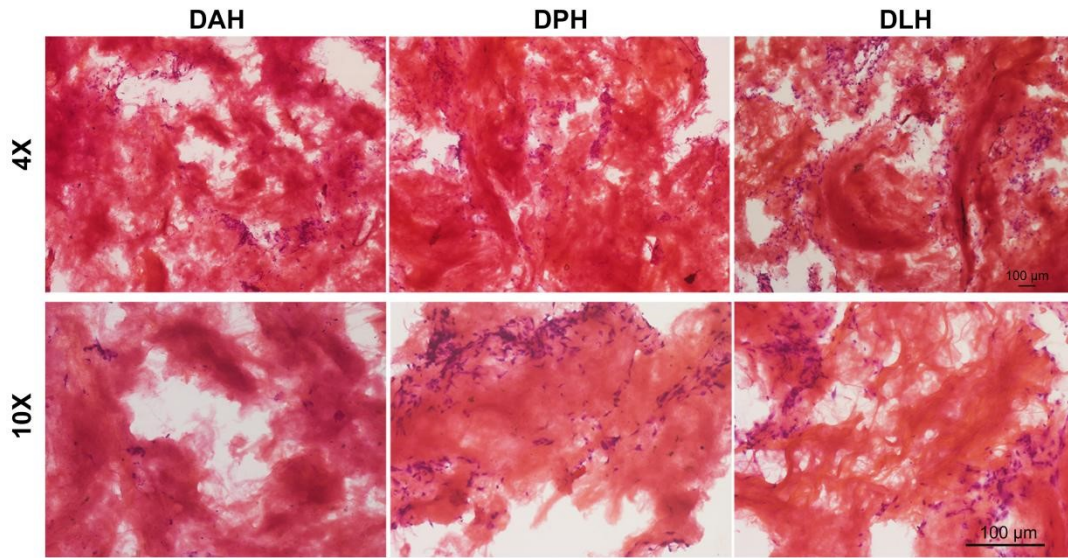

**Fig. S3. Distribution of encapsulated INSL-1 cells in dECM hydrogels.** Cells were stained with hematoxylin (nucleus) and eosin (cytoplasm).

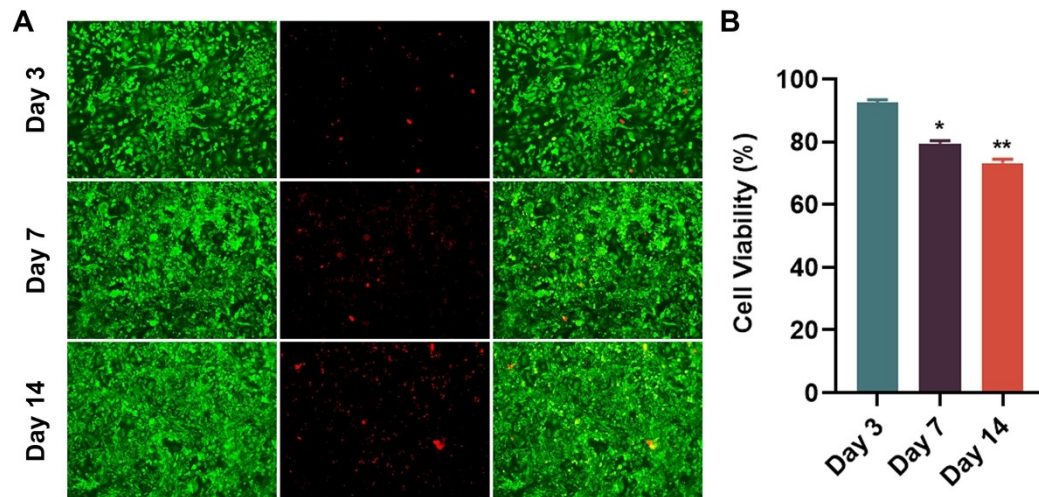

**Fig. S4. Cell viability.** A) Live/Dead staining of islet microtissues in two dimensional culture for different days. B) Quantification of Live/Dead assay results.

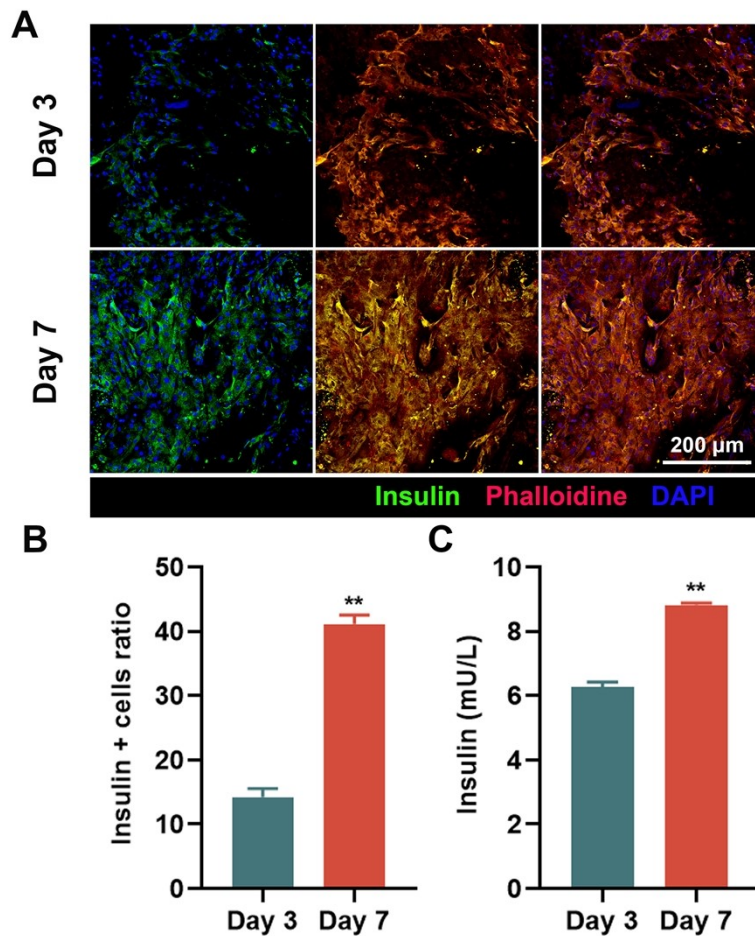

**Fig. S5. Insulin secretion in DPH at different time points.** A). Confocal images showed insulin expression in DPH at different days. Scale bar = 200  $\mu\text{m}$ . B). Quantification of insulin fluorescent images. C) Elisa was used to measure insulin secretion at different time points.

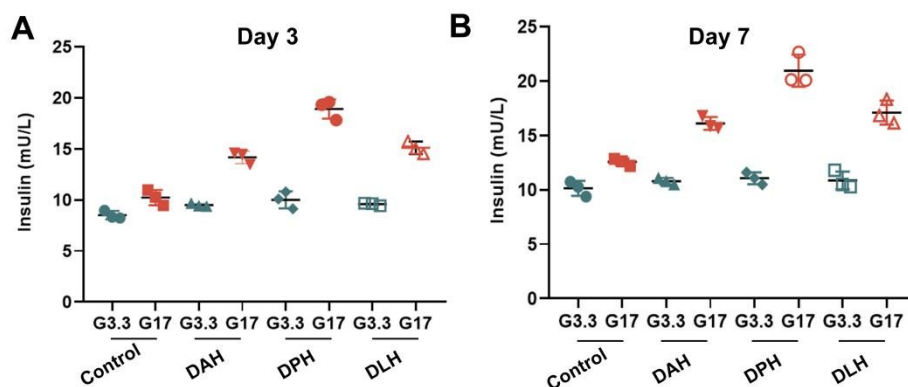

**Fig. S6. Insulin secretion in response to 3.3 mM (G3.3) or 17 mM (G17) glucose from control, DAH, DPH and DLH (n = 3).** A) Insulin secretion on Day 3. B) Insulin secretion on Day 7.



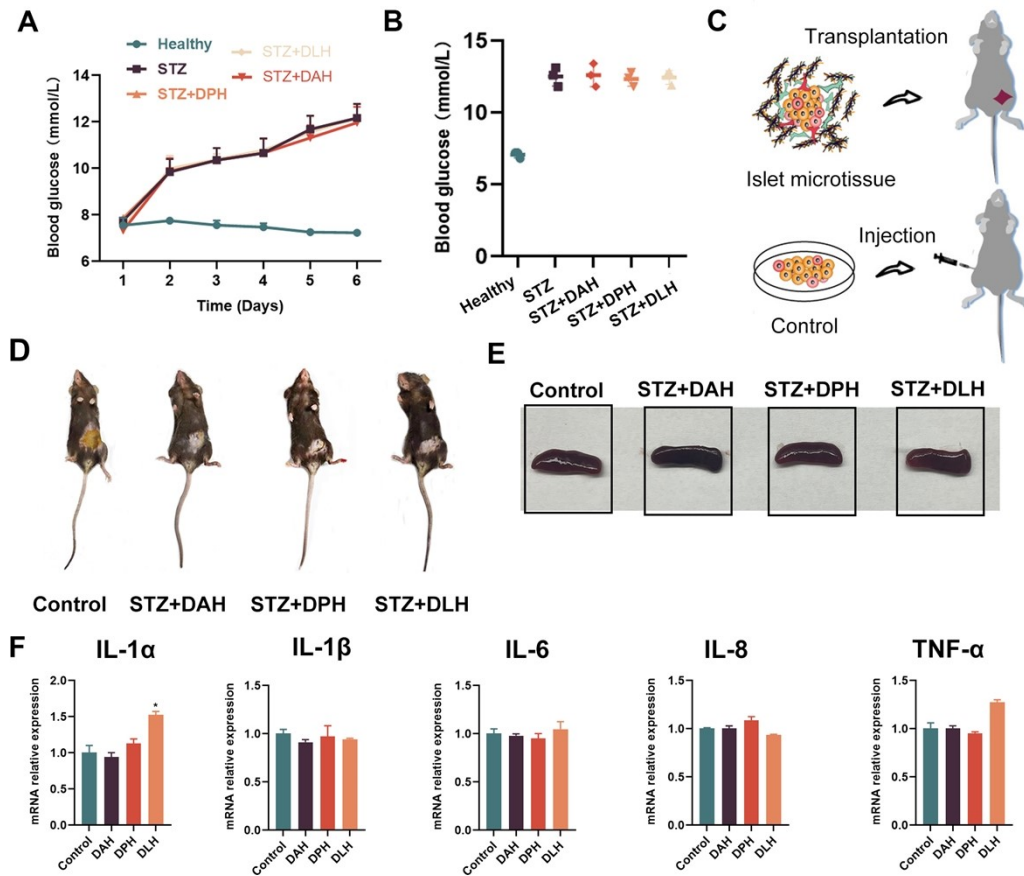

**Fig. S7. *In vivo* experiment.** A) Blood glucose was recorded during continuous STZ injection. B) Fasting blood glucose values of mice after five consecutive days of STZ injection (values greater than 11.2 mmol/L indicated successful induction of diabetes). C) Schematic diagram of animal experiment using diabetic mice. D) Islet micro-tissues (STZ+DAH, STZ+DPH, and STZ+DLH groups) were implanted subcutaneously into C57BL/6 diabetic mice. E) Physical spleen map. F) Expression of inflammatory cytokines in spleen.
